# Supplementary material
Source: PubMed Central journal article supplement (PMC2390726)
Supplement: tpc.108.058362_1.pdf [file tpc.108.058362_1.pdf]

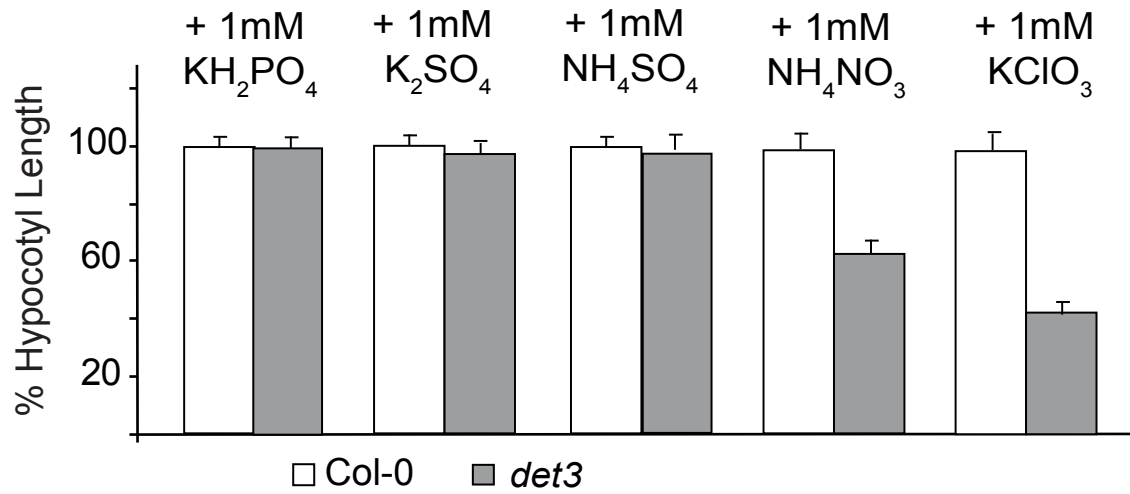

Supplemental Figure 1:

Hypocotyl length of 4d old etiolated seedlings grown at 22°C in the presence of K- salts or N- sources. At least 30 seedlings from each of three independent experiments were measured. Wt length was set to 100%, error bars represent SE.

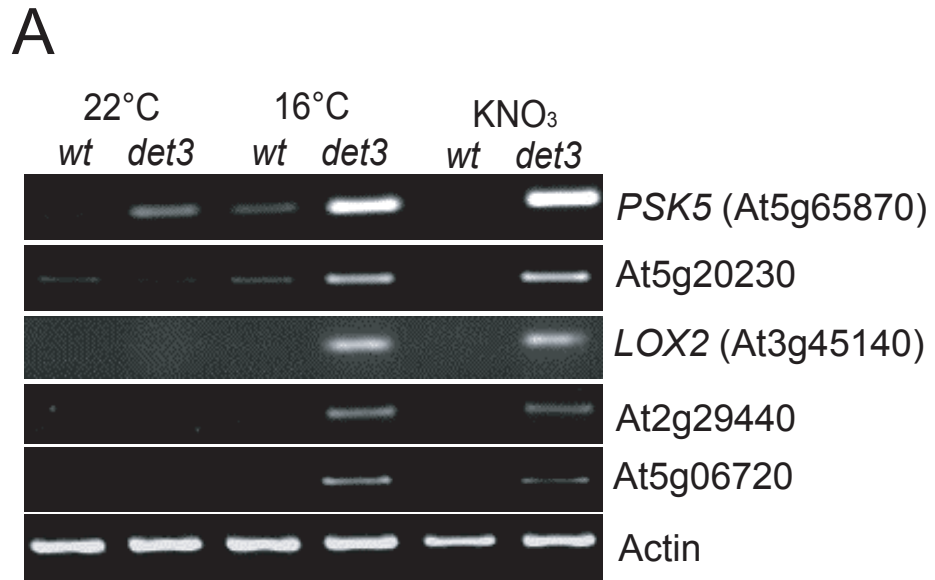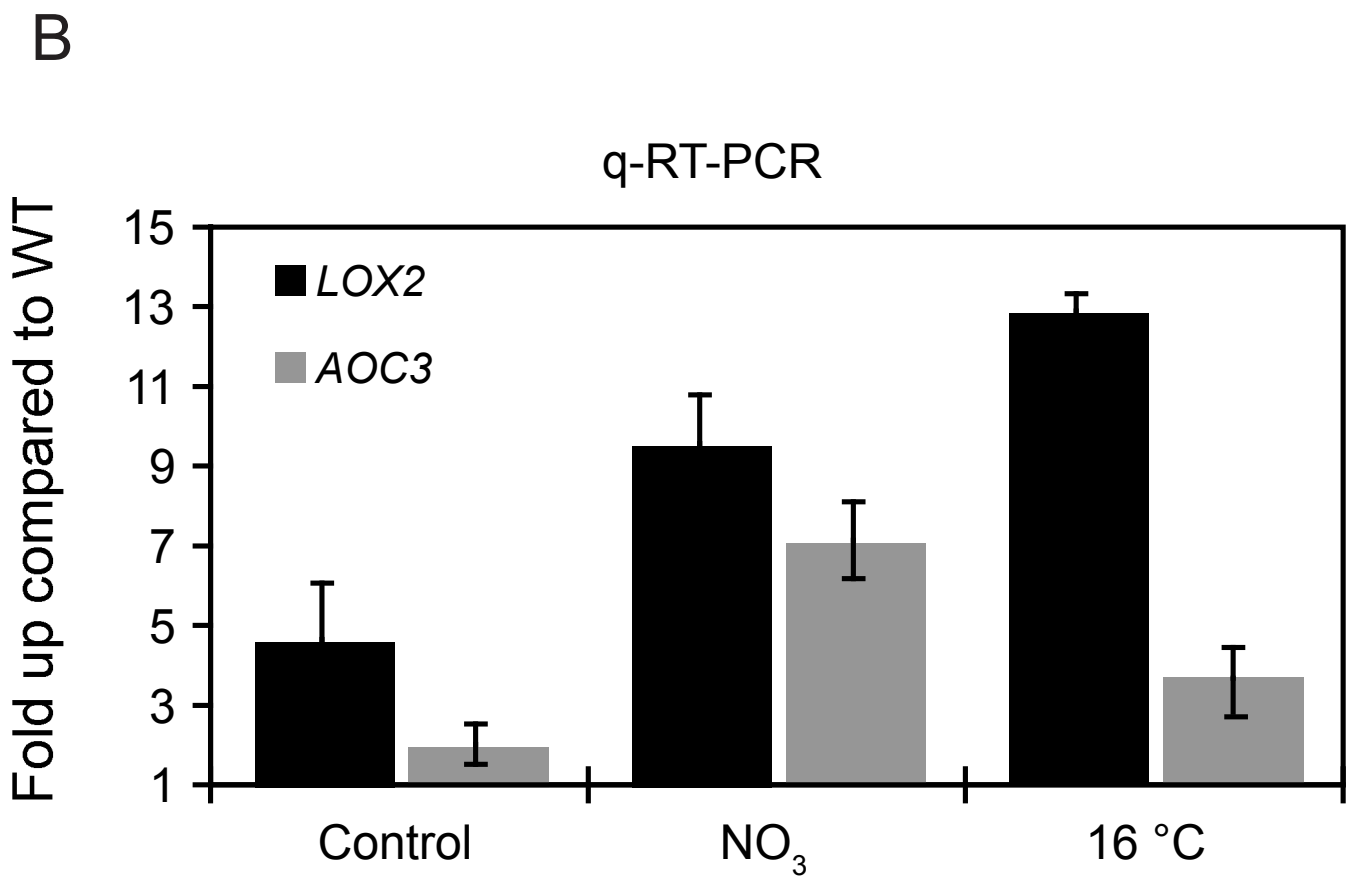

**Supplemental Figure 2:**

(A) RT-PCR of selected genes upregulated in *det3* under permissive and restrictive conditions (At5g65870) or only under restrictive conditions. Primers for *Actin 2* served as a control.

(B) q-RT-PCR of *LOX2* and *AOC3*, error bars represent SD between 3 technical replicates

## Supplemental Table 1: Oligonucleotides used in this study

### PCR + RT-PCR

| AGI code  | Name              | Sequence                                 |
|-----------|-------------------|------------------------------------------|
| At2g28520 | a1.RNAi.FOR       | GTGGTTTCCTTGTCTCAAGTAATAC                |
| At2g28520 | a1.RNAi.REV       | CAACATTCTTTCAAACCTTAAGAAG                |
| At3g45140 | LOX2.FOR          | AAGACTGACCAGCGGATTACG                    |
| At3g45140 | LOX2.REV2         | CTTGTTGGGTCAACGGACT                      |
| At5g20230 | PCL.REV           | CCA GCA GCG AAA TCA AAT TCG A            |
| At5g20230 | PCL.FOR           | TGG CCG GAG TTT TCA AAA CG               |
| At2g29440 | GST.FOR           | GAT GAA AAG ATA GTA AAT GTG GG           |
| At2g29440 | GST.REV           | TTC ACC CAT TTG TTA TAT TC               |
| At5g06720 | ATP-A2.FOR        | AGC CCT TGC CTC TGA GG                   |
| At5g06720 | ATP-A2.REV        | TAT GCG CAC CAG ATA AGG CTA CCA          |
| At5g65870 | PSK5.FOR          | AAT TGA TCT CTG TCT CAT AGT TAT          |
| At5g65870 | PSK5.REV          | CC TCT CCC TGT TCT AGT TTC TTG           |
| At3g18780 | ACT2.FOR          | TCC AAG CTG TTC TCT CCT TG               |
| At3g18780 | ACT.REV           | GAG GGC TGG AAC AAG ACT TC               |
| At1G09540 | MYB61.FOR3        | GCA TTG CAG CTG TGA ATA ACT AA           |
| At1G09540 | MYB61.REV3        | CTT CTT GAT GCT TGA GTT CCA T            |
| At1g12840 | VHA-C-intron1.FOR | GAATCGATTACAAGAGCAGATC                   |
| At1g12840 | VHA-C-intron1.REV | GCC GAG AGC GAG TAG AGA ATC              |
|           | amiRNA-A.FOR      | CTGCAAGGCGATTAAGTTGGGTAAC                |
|           | amiRNA-B.REV      | GCGGATAACAATTTACACAGGAAACAG              |
| At2g28520 | AtVHA-a1miR.FOR   | GATAGTTCGTTATATGTCTGCCCTCTCTCTTTTGTATTCC |
| At2g28520 | AtVHA-a1miR*.FOR  | GAGGACAGACATATATCGAACTTTACAGGTCGTGATATG  |
| At2g28520 | AtVHA-a1miR.REV   | GAGGGCAGACATATAACGAACTATCAAAGAGAATCAATGA |
| At2g28520 | AtVHA-a1miR*.REV  | GAAAGTTCGATATATGTCTGTCTCTACATATATATTCT   |

## qRT-PCR

| At number | Name                   | Sequence                    |
|-----------|------------------------|-----------------------------|
| At2g28520 | a1RT.FOR3              | GTTCTTCTTCTTGCCTGGGG        |
| At2g28520 | a1RT.REV3              | GGGATGTGCAAATGGCTGAGG       |
| At2g21410 | a2RT.FOR2              | GGTCCTTCTTATGGCTTGGGG       |
| At2g21410 | a2RT.REV2              | GCACACGCAGAAGAAGTC          |
| At4g39080 | a3RT.FOR2              | GAGAAGGTCCTCCTTCTCGC        |
| At4g39080 | a3RT.REV2              | GCAGAGGATGAGAGGAATG         |
| At3g45140 | LOX2-RT.FOR2           | GACCAGGAAGGCTTACCC          |
| At3g45140 | LOX2-RT.REV2           | CTCCGTGGCCTATGTTCCGC        |
| At3g25780 | AOC3-RT.FOR1           | CTGGAATTGGGGCAAGAAGACC      |
| At3g25780 | AOC3-RT.REV1           | CTAGCTTCGAATCTGTCACCGC      |
| At5g62690 | TUBULIN $\beta$ -2.FOR | GAGCCTTACAACGCTACTCTGTCTGTC |
| At5g62690 | TUBULIN $\beta$ -2.REV | ACACCAGACATAGTAGCAGAAATCAAG |

**Supplemental Table 2:  
Absolute values for Figures 4 A+B, 5A and Supplemental Figure 1**

**Figure 4 A + B**

|                                             | <b>1mM KCl</b> |             | <b>1mM KNO3</b> |             | <b>Control</b> |             | <b>16°C</b>  |             |
|---------------------------------------------|----------------|-------------|-----------------|-------------|----------------|-------------|--------------|-------------|
|                                             | <b>Col-0</b>   | <b>det3</b> | <b>Col-0</b>    | <b>det3</b> | <b>Col-0</b>   | <b>det3</b> | <b>Col-0</b> | <b>det3</b> |
| Mean (mm)                                   | 11.24          | 9.77        | 11.35           | 5.04        | 10.1           | 9.42        | 9.910        | 5.34        |
| SD                                          | 1.91           | 1.58        | 1.79            | 1.53        | 1.79           | 2.3         | 1.080        | 1.022       |
| SE                                          | 0.43           | 0.35        | 0.4             | 0.34        | 0.4            | 0.53        | 0.240        | 0.23        |
| Mean<br>( $\mu$ mol ATP/<br>mg protein * h) | 6.82           | 3.27        | 5.99            | 2.57        | 7.2            | 3.2         | 5.24         | 1.05        |
| SD                                          | 0.28           | 0.26        | 0.31            | 0.34        | 0.21           | 0.22        | 0.27         | 0.29        |

**Figure 5 A**

| <b>22°C</b>     |              |             |                |                     |
|-----------------|--------------|-------------|----------------|---------------------|
|                 | <b>Col-0</b> | <b>det3</b> | <b>myb61-1</b> | <b>myb61-1 det3</b> |
| Mean (mm)       | 10.9         | 9.48        | 10.77          | 10.01               |
| SD              | 1.34         | 2.31        | 1.45           | 2.04                |
| SE              | 0.29         | 0.51        | 0.31           | 0.45                |
| <b>1mM KNO3</b> |              |             |                |                     |
|                 | <b>Col-0</b> | <b>det3</b> | <b>myb61-1</b> | <b>myb61-1 det3</b> |
| Mean (mm)       | 11.57        | 6.22        | 12.29          | 5.94                |
| SD              | 1.59         | 1.41        | 2.43           | 1.63                |
| SE              | 0.35         | 0.3         | 0.54           | 0.36                |
| <b>16°C</b>     |              |             |                |                     |
|                 | <b>Col-0</b> | <b>det3</b> | <b>myb61-1</b> | <b>myb61-1 det3</b> |
| Mean (mm)       | 14.26        | 7.2         | 12.74          | 6.33                |
| SD              | 2.21         | 1.82        | 1.45           | 1.74                |
| SE              | 0.49         | 0.39        | 0.31           | 0.37                |

**Supplemental Figure 1**

|           | <b>KH2PO4</b> |             | <b>K2SO4</b> |             | <b>NH4SO4</b> |             | <b>NH4NO3</b> |             | <b>KClO3</b> |             |
|-----------|---------------|-------------|--------------|-------------|---------------|-------------|---------------|-------------|--------------|-------------|
|           | <b>Col-0</b>  | <b>det3</b> | <b>Col-0</b> | <b>det3</b> | <b>Col-0</b>  | <b>det3</b> | <b>Col-0</b>  | <b>det3</b> | <b>Col-0</b> | <b>det3</b> |
| Mean (mm) | 10.72         | 10.6        | 12.12        | 11.34       | 14.21         | 13.17       | 12.86         | 7.72        | 14.65        | 5.86        |
| SD        | 1.47          | 1.34        | 1.25         | 1.32        | 1.49          | 1.58        | 1.78          | 1.63        | 1.92         | 1.39        |
| SE        | 0.32          | 0.29        | 0.27         | 0.28        | 0.33          | 0.35        | 0.38          | 0.36        | 0.42         | 0.29        |
